# Supplementary material
Source: PubMed Central journal article supplement (PMC2679352)
Supplement: emm-40-523-s001.pdf [file emm-40-523-s001.pdf]

Supplemental Table 1. *LPL* SNPs identified by sequencing in this study. PCRs were performed using synthetic oligonucleotide primers prior to sequencing.

| Gene Name | SNP ID (rs# or new) | Functional Position | 5' Flanking Seq.      | Allele | 3' Flanking Seq.      | 5' (forward) PCR Primer | 3' (reverse) PCR Primer | PCR Product Size (bp) | MAF   |
|-----------|---------------------|---------------------|-----------------------|--------|-----------------------|-------------------------|-------------------------|-----------------------|-------|
| LPL_1     | rs11570898          | intron2(+155)       | cccagtgatgggtccgcacc  | C/T    | cacatctcacgtggatctcc  | GTTCTCTTGCAATCCACATT    | GGAGTTCTCATGAACCTGTG    | 491                   | 0.022 |
| LPL_2     | rs3735959           | intron3(+20)        | ggtaagactgggagaaggag  | A/C    | cttatgtgtccaaaacagtg  | GGACAGACCTGTCTCTGAAC    | ACGCTGATTCTGAAGATTG     | 480                   | 0.043 |
| LPL_3     | new                 | intron3(-54:exon4)  | tatattcattttgtttcttt  | T/C    | agttttatttttggcagaac  | ACGGAAAAGTGAAACAAAAG    | AGTGAGAGCGTCTGTGTTTT    | 500                   | 0.022 |
| LPL_4     | rs343               | intron3(-34:exon4)  | tagttttatttttggcagaa  | C/A    | tgtaagcaccttcattttct  | ACGGAAAAGTGAAACAAAAG    | AGTGAGAGCGTCTGTGTTTT    | 500                   | 0.13  |
| LPL_5     | rs249               | intron4(+74)        | tgagagagaatcagaacaaa  | T/C    | tttgtaataatcccacatgt  | ACGGAAAAGTGAAACAAAAG    | AGTGAGAGCGTCTGTGTTTT    | 500                   | 0.087 |
| LPL_6     | rs250               | intron4(+97~+98)    | attttgttaaatacccacat  | INS_TG | gtgtggtgttcttcccggag  | ACGGAAAAGTGAAACAAAAG    | AGTGAGAGCGTCTGTGTTTT    | 500                   | 0.13  |
| LPL_7     | rs254               | intron5(+33)        | tagaagcgaattaaatgtga  | C/G    | tcttatccttaacccttatt  | TCATTTTAGAAGGAGCCAAG    | TGCCCAAATGTGTATATGAA    | 527                   | 0.217 |
| LPL_8     | rs255               | intron5(+37)        | agcgaataaatgtgactct   | T/C    | atccttaacccttattgacc  | TCATTTTAGAAGGAGCCAAG    | TGCCCAAATGTGTATATGAA    | 527                   | 0.217 |
| LPL_9     | rs264               | intron5(-171:exon6) | ctcttgaaggtgggtgggccc | G/A    | ctaccaccaagaatatctcc  | TGCAACTTTCCTCTCTTGA     | GTTCCAATGGACAGAATCAG    | 539                   | 0.087 |
| LPL_10    | rs301               | intron7(+43)        | catcatggcaccagtcctcc  | T/C    | cctgccataacccttggtct  | GAACACTGTGCATGATGAAG    | TCAAATAGAGGAAAGACCTCA   | 443                   | 0.217 |
| LPL_11    | rs316               | exon8(+25)          | gaagtttccacaataagac   | C/A    | tactccttcctaatttccac  | TACTAAATGCCATCGACCTT    | AAGGTTTCCTAAAGCTCTCC    | 461                   | 0.087 |
| LPL_12    | rs326               | intron8(-187:exon9) | tagcttggtgtgctgaacacc | A/G    | ggttaggctctcaaattacc  | AACTAGCTTGTTGCTGAAC     | CATAAAGCAACAGACCCATT    | 493                   | 0.239 |
| LPL_13    | rs327               | intron8(-90:exon9)  | ttaccagcatgatcatgta   | T/G    | tatttaaacagtcctgacag  | AACTAGCTTGTTGCTGAAC     | CATAAAGCAACAGACCCATT    | 493                   | 0.239 |
| LPL_14    | rs328               | exon9(+99)          | acaagtcctctgaataagaag | C/G    | aggctggtgagcattctggg  | AACTAGCTTGTTGCTGAAC     | CATAAAGCAACAGACCCATT    | 493                   | 0.13  |
| LPL_15    | rs11570891          | intron9(-11:exon10) | aaattgcctttttcctgtg   | C/T    | tttttctcagaactgggccc  | AAAATGATGCACCTTATTGG    | ATTTTACTCTGCGCTCAAAC    | 543                   | 0.13  |
| LPL_16    | rs4922115           | exon10(+10)         | ctttttctcagaactgggccc | G/A    | aatctacagaacaaagaacg  | AAAATGATGCACCTTATTGG    | ATTTTACTCTGCGCTCAAAC    | 543                   | 0.109 |
| LPL_17    | rs11570892          | exon10(+797)        | ctgtaatcctcagctgacac  | A/G    | taatttgaatggtgcagaaa  | CGAAGAAAGGCTCGATAAA     | CGGTCCTTGTCTAAAATCTG    | 476                   | 0.109 |
| LPL_18    | rs3208305           | exon10(+828)        | ggtgcagaaaaaaaaaaga   | A/T    | accgtaattttattattaga  | CGAAGAAAGGCTCGATAAA     | CGGTCCTTGTCTAAAATCTG    | 476                   | 0.239 |
| LPL_19    | rs1803924           | exon10(+854)        | aattttattattagattctc  | C/T    | aatgattttcatcaattta   | CGAAGAAAGGCTCGATAAA     | CGGTCCTTGTCTAAAATCTG    | 476                   | 0.13  |
| LPL_20    | rs11570893          | exon10(+950)        | ttcagttgtacttccagtgcc | G/A    | tctcttttgttctctggcttt | CGAAGAAAGGCTCGATAAA     | CGGTCCTTGTCTAAAATCTG    | 476                   | 0.043 |
| LPL_21    | rs1059507           | exon10(+1143)       | atggagtaccatgagggttg  | C/T    | tatttgtgtttttaacaac   | CATAATTTGAATGGTGCAGA    | CACACATGCAGAGCTTTCTA    | 543                   | 0.109 |
| LPL_22    | rs3735964           | exon10(+1225)       | ctatttttcagaatgctctt  | C/A    | tacgtataaatatgaaatga  | CATAATTTGAATGGTGCAGA    | CACACATGCAGAGCTTTCTA    | 543                   | 0.13  |
| LPL_23    | rs3200218           | exon10(+1251)       | ataaatatgaaatgataaag  | A/G    | tgtcaaatatctcagaggct  | CATAATTTGAATGGTGCAGA    | CACACATGCAGAGCTTTCTA    | 543                   | 0.174 |
| LPL_24    | rs13702             | exon10(+1672)       | tctggctccgaaaaactttg  | T/C    | tatatatatcaaggatgttc  | GGCATCCCCTTTATTAATTC    | CTCAGAAGCTCTTCGGTTTA    | 510                   | 0.091 |
| LPL_25    | rs1059611           | exon10(+1743)       | tacatgtgtggatgtgtaaa  | T/C    | ggagcttgtacatattggaa  | GGCATCCCCTTTATTAATTC    | CTCAGAAGCTCTTCGGTTTA    | 510                   | 0.023 |
| LPL_26    | rs10645926          | exon10(+1806~+1808) | ataaatgtgtggtgctaact  | INS_TT | atgtgtctttatcagtgatg  | GGCATCCCCTTTATTAATTC    | CTCAGAAGCTCTTCGGTTTA    | 510                   | 0.023 |
| LPL_27    | rs15285             | exon10(+1847)       | atggtctcacagagccaact  | C/T    | actcttatgaaatgggcttt  | GGCATCCCCTTTATTAATTC    | CTCAGAAGCTCTTCGGTTTA    | 510                   | 0.091 |
| LPL_28    | rs3866471           | exon10(+1849)       | ggtctcacagagccaactca  | C/A    | tcttatgaaatgggctttaa  | GGCATCCCCTTTATTAATTC    | CTCAGAAGCTCTTCGGTTTA    | 510                   | 0.062 |
| LPL_29    | rs3916027           | 3'downstream(+99)   | accactgtacttagtaaac   | G/A    | aagagcttctgagaattata  | TGAAGAAATGGAATCAGCTT    | TGCTACTTGCCTTACAGCTA    | 419                   | 0.25  |
| LPL_30    | rs9644636           | 3'downstream(+127)  | tctgagaattatagtgtacc  | T/G    | tatagatatttttaacattt  | TGAAGAAATGGAATCAGCTT    | TGCTACTTGCCTTACAGCTA    | 419                   | 0.159 |
| LPL_31    | rs4921683           | 3'downstream(+299)  | tgtagactaatataaggca   | T/A    | ctttggccattttatagtg   | TGAAGAAATGGAATCAGCTT    | TGCTACTTGCCTTACAGCTA    | 419                   | 0.114 |

**Supplemental Table 2.** Regression analyses of LPL SNPs with T2DM-related phenotypes while controlling for age, sex, and BMI as covariates in normal controls. Shaded boxes indicate  $p < 0.05$ .

| T2DM related phenotype | SNP ID    | anova   | codominant | dominant | recessive | C/C   |         |         | C/R    |         |         | R/R    |         |         |
|------------------------|-----------|---------|------------|----------|-----------|-------|---------|---------|--------|---------|---------|--------|---------|---------|
|                        |           | p-value | p-value    | p-value  | p-value   | Freq  | mean    | S.D     | Freq   | mean    | S.D     | Freq   | mean    | S.D     |
| BMI                    | rs343     | 0.431   | 0.227      | 0.337    | 0.221     | 327   | 23.226  | 3.077   | 131    | 23.432  | 3.211   | 10     | 24.415  | 3.503   |
|                        | rs249     | 0.144   | 0.084      | 0.054    | 0.974     | 405   | 23.203  | 3.074   | 57     | 24.064  | 3.404   | 5      | 23.708  | 2.988   |
|                        | rs316     | 0.134   | 0.145      | 0.094    | 0.535     | 389   | 23.225  | 2.984   | 76     | 23.869  | 3.680   | 3      | 21.269  | 2.921   |
|                        | rs328     | 0.464   | 0.316      | 0.236    | 0.862     | 344   | 23.218  | 3.087   | 101    | 23.657  | 3.296   | 9      | 23.258  | 2.746   |
|                        | rs4922115 | 0.127   | 0.129      | 0.085    | 0.558     | 383   | 23.194  | 2.964   | 81     | 23.839  | 3.743   | 3      | 21.269  | 2.921   |
|                        | rs3208305 | 0.292   | 0.088      | 0.180    | 0.106     | 289   | 23.179  | 2.929   | 155    | 23.450  | 3.363   | 24     | 24.124  | 3.548   |
|                        | rs3200218 | 0.260   | 0.599      | 0.422    | 0.259     | 361   | 23.381  | 3.166   | 104    | 22.973  | 2.984   | 4      | 25.086  | 1.145   |
|                        | rs13702   | 0.300   | 0.094      | 0.192    | 0.106     | 288   | 23.181  | 2.934   | 155    | 23.443  | 3.364   | 24     | 24.124  | 3.548   |
|                        | rs9644636 | 0.515   | 0.208      | 0.238    | 0.469     | 322   | 23.408  | 3.088   | 133    | 23.114  | 3.200   | 12     | 22.677  | 3.375   |
|                        | WHR       | rs343   | 0.465      | 0.360    | 0.254     | 0.698 | 327     | 0.910   | 0.066  | 131     | 0.903   | 0.065  | 10      | 0.925   |
| rs249                  |           | 0.060   | 0.084      | 0.061    | 0.831     | 405   | 0.906   | 0.067   | 57     | 0.927   | 0.057   | 5      | 0.916   | 0.054   |
| rs316                  |           | 0.489   | 0.085      | 0.098    | 0.426     | 389   | 0.910   | 0.066   | 76     | 0.904   | 0.060   | 3      | 0.875   | 0.015   |
| rs328                  |           | 0.208   | 0.137      | 0.156    | 0.432     | 344   | 0.905   | 0.065   | 101    | 0.917   | 0.069   | 9      | 0.924   | 0.049   |
| rs4922115              |           | 0.464   | 0.068      | 0.076    | 0.457     | 383   | 0.910   | 0.067   | 81     | 0.902   | 0.059   | 3      | 0.875   | 0.015   |
| rs3208305              |           | 0.879   | 0.865      | 0.906    | 0.474     | 289   | 0.908   | 0.067   | 155    | 0.911   | 0.064   | 24     | 0.910   | 0.051   |
| rs3200218              |           | 0.009   | 0.001      | 0.000    | 0.847     | 361   | 0.903   | 0.065   | 104    | 0.925   | 0.065   | 4      | 0.913   | 0.049   |
| rs13702                |           | 0.885   | 0.862      | 0.907    | 0.468     | 288   | 0.908   | 0.067   | 155    | 0.911   | 0.064   | 24     | 0.910   | 0.051   |
| rs9644636              |           | 0.900   | 0.852      | 0.882    | 0.854     | 322   | 0.909   | 0.067   | 133    | 0.906   | 0.064   | 12     | 0.907   | 0.054   |
| BODY_FAT               |           | rs343   | 0.520      | 0.220    | 0.394     | 0.078 | 226     | 26.524  | 7.393  | 89      | 25.806  | 7.742  | 5       | 23.431  |
|                        | rs249     | 0.318   | 0.617      | 0.505    | 0.758     | 274   | 26.436  | 7.526   | 41     | 24.874  | 7.382   | 4      | 29.534  | 8.475   |
|                        | rs316     | 0.733   | 0.021      | 0.021    |           | 272   | 26.346  | 7.444   | 49     | 25.948  | 7.891   | 0      |         |         |
|                        | rs328     | 0.791   | 0.750      | 0.777    | 0.813     | 237   | 26.479  | 7.581   | 67     | 25.761  | 7.428   | 7      | 26.244  | 9.298   |
|                        | rs4922115 | 0.894   | 0.121      | 0.121    |           | 268   | 26.274  | 7.420   | 52     | 26.426  | 8.038   | 0      |         |         |
|                        | rs3208305 | 0.650   | 0.198      | 0.276    | 0.296     | 203   | 26.541  | 7.367   | 103    | 25.721  | 7.765   | 15     | 26.704  | 7.794   |
|                        | rs3200218 | 0.877   | 0.431      | 0.345    | 0.511     | 247   | 26.389  | 7.511   | 72     | 25.904  | 7.561   | 2      | 27.215  | 7.916   |
|                        | rs13702   | 0.623   | 0.173      | 0.237    | 0.297     | 202   | 26.540  | 7.386   | 103    | 25.678  | 7.747   | 15     | 26.704  | 7.794   |
|                        | rs9644636 | 0.237   | 0.446      | 0.217    | 0.388     | 217   | 26.759  | 7.643   | 90     | 25.158  | 6.953   | 11     | 26.489  | 9.225   |
|                        | SBP       | rs343   | 0.302      | 0.305    | 0.188     | 0.585 | 327     | 121.631 | 17.631 | 131     | 119.201 | 16.149 | 10      | 125.067 |
| rs249                  |           | 0.648   | 0.911      | 0.865    | 0.331     | 405   | 121.050 | 17.421  | 57     | 120.468 | 16.883  | 5      | 128.000 | 12.953  |
| rs316                  |           | 0.531   | 0.136      | 0.129    | 0.772     | 389   | 121.409 | 17.509  | 76     | 118.974 | 16.176  | 3      | 120.000 | 21.197  |
| rs328                  |           | 0.653   | 0.745      | 0.548    | 0.472     | 344   | 121.353 | 17.488  | 101    | 120.198 | 17.336  | 9      | 125.259 | 11.597  |
| rs4922115              |           | 0.341   | 0.065      | 0.059    | 0.768     | 383   | 121.530 | 17.527  | 81     | 118.428 | 16.146  | 3      | 120.000 | 21.197  |
| rs3208305              |           | 0.674   | 0.201      | 0.323    | 0.214     | 289   | 121.511 | 17.596  | 155    | 120.378 | 17.348  | 24     | 118.944 | 13.365  |
| rs3200218              |           | 0.874   | 0.631      | 0.603    | 0.957     | 361   | 120.796 | 16.812  | 104    | 121.795 | 19.101  | 4      | 121.000 | 12.806  |
| rs13702                |           | 0.579   | 0.151      | 0.238    | 0.215     | 288   | 121.627 | 17.515  | 155    | 120.142 | 17.538  | 24     | 118.944 | 13.365  |
| rs9644636              |           | 0.994   | 0.678      | 0.630    | 0.975     | 322   | 121.025 | 17.305  | 133    | 121.068 | 17.520  | 12     | 120.500 | 16.873  |
| DBP                    |           | rs343   | 0.090      | 0.719    | 0.358     | 0.100 | 327     | 75.566  | 9.539  | 131     | 74.366  | 10.509 | 10      | 81.067  |
|                        | rs249     | 0.813   | 0.723      | 0.834    | 0.538     | 405   | 75.274  | 10.016  | 57     | 75.766  | 9.201   | 5      | 77.733  | 8.036   |
|                        | rs316     | 0.742   | 0.241      | 0.244    | 0.715     | 389   | 75.517  | 9.715   | 76     | 74.605  | 10.841  | 3      | 74.000  | 6.928   |
|                        | rs328     | 0.614   | 0.471      | 0.601    | 0.374     | 344   | 75.283  | 9.816   | 101    | 75.875  | 10.571  | 9      | 78.222  | 6.912   |
|                        | rs4922115 | 0.440   | 0.092      | 0.089    | 0.726     | 383   | 75.619  | 9.735   | 81     | 74.099  | 10.503  | 3      | 74.000  | 6.928   |
|                        | rs3208305 | 0.874   | 0.723      | 0.977    | 0.374     | 289   | 75.285  | 9.492   | 155    | 75.617  | 10.856  | 24     | 74.583  | 7.994   |
|                        | rs3200218 | 0.939   | 0.851      | 0.928    | 0.620     | 361   | 75.391  | 9.986   | 104    | 75.295  | 9.648   | 4      | 73.667  | 5.696   |
|                        | rs13702   | 0.916   | 0.619      | 0.840    | 0.376     | 288   | 75.345  | 9.453   | 155    | 75.492  | 10.947  | 24     | 74.583  | 7.994   |
|                        | rs9644636 | 0.112   | 0.072      | 0.093    | 0.295     | 322   | 75.936  | 9.854   | 133    | 74.150  | 9.840   | 12     | 72.111  | 10.110  |
|                        | log-TG    | rs343   | 0.291      | 0.270    | 0.371     | 0.290 | 327     | 2.13    | 0.18   | 131     | 2.14    | 0.18   | 10      | 2.21    |
| rs249                  |           | 0.284   | 0.034      | 0.029    | 0.537     | 405   | 2.14    | 0.18    | 57     | 2.10    | 0.19    | 5      | 2.09    | 0.06    |
| rs316                  |           | 0.712   | 0.647      | 0.772    | 0.358     | 389   | 2.13    | 0.18    | 76     | 2.15    | 0.18    | 3      | 2.20    | 0.10    |
| rs328                  |           | 0.125   | 0.017      | 0.022    | 0.219     | 344   | 2.15    | 0.18    | 101    | 2.11    | 0.19    | 9      | 2.07    | 0.09    |
| rs4922115              |           | 0.625   | 0.537      | 0.640    | 0.372     | 383   | 2.13    | 0.18    | 81     | 2.15    | 0.18    | 3      | 2.20    | 0.10    |
| rs3208305              |           | 0.539   | 0.163      | 0.306    | 0.140     | 289   | 2.14    | 0.17    | 155    | 2.13    | 0.19    | 24     | 2.10    | 0.14    |
| rs3200218              |           | 0.300   | 0.154      | 0.195    | 0.329     | 361   | 2.14    | 0.18    | 104    | 2.11    | 0.17    | 4      | 2.08    | 0.11    |
| rs13702                |           | 0.523   | 0.147      | 0.274    | 0.141     | 288   | 2.14    | 0.17    | 155    | 2.13    | 0.19    | 24     | 2.10    | 0.14    |
| rs9644636              |           | 0.126   | 0.614      | 0.276    | 0.131     | 322   | 2.13    | 0.19    | 133    | 2.15    | 0.15    | 12     | 2.05    | 0.10    |
| TCHOL                  |           | rs343   | 0.082      | 0.606    | 0.939     | 0.038 | 327     | 180.437 | 31.573 | 131     | 178.962 | 31.904 | 10      | 202.300 |
|                        | rs249     | 0.910   | 0.952      | 0.999    | 0.829     | 405   | 180.202 | 31.855  | 57     | 182.158 | 32.555  | 5      | 180.400 | 26.159  |
|                        | rs316     | 0.723   | 0.742      | 0.775    | 0.771     | 389   | 180.470 | 31.141  | 76     | 180.658 | 35.029  | 3      | 165.667 | 36.747  |
|                        | rs328     | 0.938   | 0.522      | 0.540    | 0.735     | 344   | 181.195 | 32.504  | 101    | 180.257 | 30.794  | 9      | 178.333 | 22.814  |
|                        | rs4922115 | 0.645   | 0.963      | 0.907    | 0.747     | 383   | 180.337 | 30.960  | 81     | 182.148 | 35.609  | 3      | 165.667 | 36.747  |
|                        | rs3208305 | 0.955   | 0.798      | 0.919    | 0.644     | 289   | 180.311 | 31.542  | 155    | 180.832 | 32.257  | 24     | 178.792 | 32.836  |
|                        | rs3200218 | 0.023   | 0.716      | 0.393    | 0.032     | 361   | 181.341 | 32.149  | 104    | 176.000 | 29.247  | 4      | 216.750 | 38.586  |
|                        | rs13702   | 0.967   | 0.729      | 0.833    | 0.644     | 288   | 180.424 | 31.539  | 155    | 180.587 | 32.361  | 24     | 178.792 | 32.836  |
|                        | rs9644636 | 0.938   | 0.933      | 0.910    | 0.958     | 322   | 180.770 | 32.473  | 133    | 179.632 | 30.452  | 12     | 179.667 | 24.344  |
|                        | HDL       | rs343   | 0.174      | 0.179    | 0.403     | 0.036 | 327     | 44.144  | 9.846  | 131     | 44.397  | 10.041 | 10      | 50.100  |
| rs249                  |           | 0.773   | 0.443      | 0.348    | 0.799     | 405   | 44.249  | 9.860   | 57     | 45.193  | 10.502  | 5      | 43.200  | 11.692  |
| rs316                  |           | 0.679   | 0.596      | 0.575    | 0.995     | 389   | 44.509  | 10.152  | 76     | 43.421  | 8.907   | 3      | 45.000  | 4.583   |
| rs328                  |           | 0.563   | 0.206      | 0.221    | 0.535     | 344   | 43.971  | 9.940   | 101    | 44.941  | 9.916   | 9      | 46.333  | 10.712  |
| rs4922115              |           | 0.825   | 0.778      | 0.768    | 0.989     | 383   | 44.483  | 10.097  | 81     | 43.741  | 9.367   | 3      | 45.000  | 4.583   |
| rs3208305              |           | 0.839   | 0.410      | 0.530    | 0.410     | 289   | 44.197  | 10.124  | 155    | 44.426  | 9.613   | 24     | 45.417  | 9.952   |
| rs3200218              |           | 0.378   | 0.386      | 0.557    | 0.128     | 361   | 44.161  | 9.911   | 104    | 44.731  | 9.761   | 4      | 50.750  | 15.283  |
| rs13702                |           | 0.851   | 0.440      | 0.571    | 0.414     | 288   | 44.226  | 10.130  | 155    | 44.400  | 9.630   | 24     | 45.417  | 9.952   |
| rs9644636              |           | 0.175   | 0.232      | 0.107    | 0.457     | 322   | 44.826  | 10.134  | 133    | 43.135  | 9.304   | 12     | 46.833  | 9.778   |
| LDL                    |           | rs343   | 0.230      | 0.716    | 0.421     | 0.206 | 323     | 107.247 | 27.472 | 131     | 104.321 | 27.937 | 10      | 118.620 |
|                        | rs249     | 0.599   | 0.536      | 0.536    | 0.806     | 402   | 106.043 | 27.582  | 56     | 109.618 | 29.710  | 5      | 112.240 | 21.399  |
|                        | rs316     | 0.536   | 0.704      | 0.782    | 0.555     | 385   | 106.651 | 27.509  | 76     | 106.813 | 28.918  | 3      | 88.733  | 31.916  |
|                        | rs328     | 0.982   | 0.927      | 0.907    | 0.966     | 343   | 106.864 | 28.173  | 98     | 107.286 | 27.071  | 9      | 108.244 | 22.629  |
|                        | rs492     |         |            |          |           |       |         |         |        |         |         |        |         |         |

|           |           |       |       |       |       |       |      |      |       |      |      |       |      |      |
|-----------|-----------|-------|-------|-------|-------|-------|------|------|-------|------|------|-------|------|------|
| log-Glu0  | rs343     | 0.896 | 0.692 | 0.640 | 0.930 | 327   | 1.87 | 0.02 | 131   | 1.87 | 0.02 | 10    | 1.87 | 0.02 |
|           | rs249     | 0.225 | 0.676 | 0.378 | 0.173 | 405   | 1.87 | 0.02 | 57    | 1.87 | 0.02 | 5     | 1.89 | 0.02 |
|           | rs316     | 0.001 | 0.091 | 0.284 | 0.001 | 389   | 1.87 | 0.02 | 76    | 1.87 | 0.02 | 3     | 1.83 | 0.02 |
|           | rs328     | 0.924 | 0.919 | 0.991 | 0.750 | 344   | 1.87 | 0.02 | 101   | 1.87 | 0.02 | 9     | 1.87 | 0.03 |
|           | rs4922115 | 0.001 | 0.264 | 0.633 | 0.001 | 383   | 1.87 | 0.02 | 81    | 1.87 | 0.02 | 3     | 1.83 | 0.02 |
|           | rs3208305 | 0.725 | 0.398 | 0.528 | 0.383 | 289   | 1.87 | 0.02 | 155   | 1.87 | 0.02 | 24    | 1.87 | 0.03 |
|           | rs3200218 | 0.252 | 0.492 | 0.687 | 0.137 | 361   | 1.87 | 0.02 | 104   | 1.87 | 0.02 | 4     | 1.89 | 0.01 |
|           | rs13702   | 0.722 | 0.382 | 0.502 | 0.390 | 288   | 1.87 | 0.02 | 155   | 1.87 | 0.02 | 24    | 1.87 | 0.03 |
|           | rs9644636 | 0.817 | 0.481 | 0.563 | 0.519 | 322   | 1.87 | 0.02 | 133   | 1.87 | 0.02 | 12    | 1.88 | 0.02 |
|           | rs343     | 0.326 | 0.361 | 0.618 | 0.100 | 327   | 2.08 | 0.13 | 131   | 2.08 | 0.12 | 10    | 2.02 | 0.17 |
| rs249     | 0.261     | 0.585 | 0.923 | 0.091 | 405   | 2.08  | 0.13 | 57   | 2.07  | 0.11 | 5    | 2.17  | 0.10 |      |
| rs316     | 0.275     | 0.377 | 0.560 | 0.096 | 389   | 2.08  | 0.13 | 76   | 2.08  | 0.12 | 3    | 1.96  | 0.19 |      |
| rs328     | 0.112     | 0.518 | 0.971 | 0.033 | 344   | 2.08  | 0.13 | 101  | 2.07  | 0.13 | 9    | 2.16  | 0.08 |      |
| rs4922115 | 0.273     | 0.474 | 0.680 | 0.096 | 383   | 2.08  | 0.13 | 81   | 2.08  | 0.12 | 3    | 1.96  | 0.19 |      |
| rs3208305 | 0.823     | 0.876 | 0.722 | 0.712 | 289   | 2.07  | 0.13 | 155  | 2.08  | 0.13 | 24   | 2.07  | 0.12 |      |
| rs3200218 | 0.947     | 0.797 | 0.815 | 0.857 | 361   | 2.07  | 0.13 | 104  | 2.08  | 0.14 | 4    | 2.10  | 0.11 |      |
| rs13702   | 0.803     | 0.853 | 0.692 | 0.705 | 288   | 2.07  | 0.13 | 155  | 2.08  | 0.13 | 24   | 2.07  | 0.12 |      |
| rs9644636 | 0.266     | 0.178 | 0.277 | 0.200 | 322   | 2.08  | 0.13 | 133  | 2.07  | 0.12 | 12   | 2.02  | 0.17 |      |
| rs343     | 0.650     | 0.620 | 0.489 | 0.660 | 327   | 1.98  | 0.10 | 131  | 1.97  | 0.13 | 10   | 2.00  | 0.09 |      |
| rs249     | 0.663     | 0.907 | 0.740 | 0.510 | 405   | 1.98  | 0.11 | 57   | 1.98  | 0.09 | 5    | 2.02  | 0.09 |      |
| rs316     | 0.436     | 0.847 | 0.857 | 0.070 | 389   | 1.98  | 0.11 | 76   | 1.98  | 0.11 | 3    | 2.06  | 0.05 |      |
| rs328     | 0.154     | 0.139 | 0.259 | 0.098 | 344   | 1.98  | 0.11 | 101  | 1.99  | 0.11 | 9    | 2.04  | 0.07 |      |
| rs4922115 | 0.457     | 0.540 | 0.794 | 0.062 | 383   | 1.98  | 0.11 | 81   | 1.98  | 0.11 | 3    | 2.06  | 0.05 |      |
| rs3208305 | 0.132     | 0.053 | 0.091 | 0.149 | 289   | 1.98  | 0.11 | 155  | 1.99  | 0.11 | 24   | 2.02  | 0.09 |      |
| rs3200218 | 0.625     | 0.846 | 0.970 | 0.442 | 361   | 1.98  | 0.12 | 104  | 1.98  | 0.10 | 4    | 2.03  | 0.05 |      |
| rs13702   | 0.134     | 0.055 | 0.096 | 0.146 | 288   | 1.98  | 0.11 | 155  | 1.99  | 0.11 | 24   | 2.02  | 0.09 |      |
| rs9644636 | 0.152     | 0.133 | 0.259 | 0.094 | 322   | 1.99  | 0.11 | 133  | 1.98  | 0.11 | 12   | 1.93  | 0.17 |      |
| rs343     | 0.566     | 0.370 | 0.535 | 0.230 | 327   | 2.32  | 0.08 | 131  | 2.32  | 0.08 | 10   | 2.29  | 0.09 |      |
| rs249     | 0.180     | 0.778 | 0.821 | 0.075 | 405   | 2.32  | 0.08 | 57   | 2.31  | 0.08 | 5    | 2.38  | 0.05 |      |
| rs316     | 0.552     | 0.454 | 0.560 | 0.323 | 389   | 2.32  | 0.08 | 76   | 2.31  | 0.08 | 3    | 2.26  | 0.11 |      |
| rs328     | 0.069     | 0.368 | 0.800 | 0.019 | 344   | 2.32  | 0.08 | 101  | 2.31  | 0.08 | 9    | 2.38  | 0.05 |      |
| rs4922115 | 0.559     | 0.638 | 0.767 | 0.332 | 383   | 2.32  | 0.09 | 81   | 2.32  | 0.08 | 3    | 2.26  | 0.11 |      |
| rs3208305 | 0.669     | 0.542 | 0.463 | 0.989 | 289   | 2.31  | 0.09 | 155  | 2.32  | 0.08 | 24   | 2.32  | 0.08 |      |
| rs3200218 | 0.839     | 0.680 | 0.732 | 0.664 | 361   | 2.32  | 0.08 | 104  | 2.32  | 0.09 | 4    | 2.34  | 0.06 |      |
| rs13702   | 0.661     | 0.533 | 0.452 | 0.992 | 288   | 2.31  | 0.09 | 155  | 2.32  | 0.08 | 24   | 2.32  | 0.08 |      |
| rs9644636 | 0.131     | 0.082 | 0.145 | 0.138 | 322   | 2.32  | 0.08 | 133  | 2.31  | 0.08 | 12   | 2.28  | 0.11 |      |
| rs343     | 0.972     | 0.975 | 0.962 | 0.970 | 327   | 0.72  | 0.32 | 131  | 0.72  | 0.38 | 10   | 0.74  | 0.47 |      |
| rs249     | 0.463     | 0.510 | 0.636 | 0.384 | 405   | 0.71  | 0.35 | 57   | 0.74  | 0.27 | 5    | 0.87  | 0.15 |      |
| rs316     | 0.085     | 0.352 | 0.542 | 0.078 | 389   | 0.72  | 0.33 | 76   | 0.72  | 0.36 | 3    | 0.28  | 1.12 |      |
| rs328     | 0.716     | 0.373 | 0.295 | 0.898 | 344   | 0.72  | 0.35 | 101  | 0.69  | 0.33 | 9    | 0.74  | 0.24 |      |
| rs4922115 | 0.074     | 0.678 | 0.942 | 0.077 | 383   | 0.72  | 0.33 | 81   | 0.74  | 0.35 | 3    | 0.28  | 1.12 |      |
| rs3208305 | 0.716     | 0.281 | 0.317 | 0.497 | 289   | 0.73  | 0.32 | 155  | 0.70  | 0.36 | 24   | 0.69  | 0.42 |      |
| rs3200218 | 0.513     | 0.148 | 0.134 | 0.865 | 361   | 0.71  | 0.35 | 104  | 0.75  | 0.30 | 4    | 0.78  | 0.26 |      |
| rs13702   | 0.723     | 0.287 | 0.325 | 0.498 | 288   | 0.73  | 0.32 | 155  | 0.70  | 0.36 | 24   | 0.69  | 0.42 |      |
| rs9644636 | 0.740     | 0.305 | 0.271 | 0.856 | 322   | 0.71  | 0.33 | 133  | 0.74  | 0.34 | 12   | 0.72  | 0.49 |      |
| rs343     | 0.643     | 0.714 | 0.548 | 0.543 | 327   | 1.29  | 0.43 | 131  | 1.33  | 0.46 | 10   | 1.24  | 0.35 |      |
| rs249     | 0.558     | 0.822 | 0.602 | 0.375 | 405   | 1.30  | 0.44 | 57   | 1.27  | 0.37 | 5    | 1.48  | 0.21 |      |
| rs316     | 0.370     | 0.723 | 0.560 | 0.329 | 389   | 1.30  | 0.44 | 76   | 1.35  | 0.42 | 3    | 1.04  | 0.45 |      |
| rs328     | 0.130     | 0.669 | 0.322 | 0.118 | 344   | 1.31  | 0.45 | 101  | 1.25  | 0.40 | 9    | 1.53  | 0.24 |      |
| rs4922115 | 0.398     | 0.778 | 0.616 | 0.324 | 383   | 1.30  | 0.44 | 81   | 1.34  | 0.42 | 3    | 1.04  | 0.45 |      |
| rs3208305 | 0.747     | 0.653 | 0.531 | 0.858 | 289   | 1.31  | 0.45 | 155  | 1.28  | 0.42 | 24   | 1.34  | 0.37 |      |
| rs3200218 | 0.578     | 0.277 | 0.293 | 0.641 | 361   | 1.29  | 0.44 | 104  | 1.33  | 0.43 | 4    | 1.42  | 0.23 |      |
| rs13702   | 0.746     | 0.653 | 0.532 | 0.859 | 288   | 1.31  | 0.45 | 155  | 1.28  | 0.42 | 24   | 1.34  | 0.37 |      |
| rs9644636 | 0.817     | 0.942 | 0.911 | 0.569 | 322   | 1.30  | 0.41 | 133  | 1.31  | 0.49 | 12   | 1.22  | 0.35 |      |
| rs343     | 0.199     | 0.928 | 0.700 | 0.123 | 327   | 1.18  | 0.40 | 131  | 1.15  | 0.40 | 10   | 1.39  | 0.49 |      |
| rs249     | 0.240     | 0.450 | 0.242 | 0.288 | 405   | 1.18  | 0.41 | 57   | 1.12  | 0.35 | 5    | 1.40  | 0.22 |      |
| rs316     | 0.423     | 0.308 | 0.458 | 0.112 | 389   | 1.17  | 0.41 | 76   | 1.21  | 0.37 | 3    | 1.44  | 0.34 |      |
| rs328     | 0.020     | 0.662 | 0.217 | 0.022 | 344   | 1.19  | 0.41 | 101  | 1.12  | 0.38 | 9    | 1.49  | 0.24 |      |
| rs4922115 | 0.413     | 0.310 | 0.458 | 0.112 | 383   | 1.17  | 0.41 | 81   | 1.21  | 0.36 | 3    | 1.44  | 0.34 |      |
| rs3208305 | 0.659     | 0.686 | 0.865 | 0.479 | 289   | 1.17  | 0.42 | 155  | 1.18  | 0.36 | 24   | 1.25  | 0.41 |      |
| rs3200218 | 0.780     | 0.488 | 0.531 | 0.619 | 361   | 1.17  | 0.41 | 104  | 1.19  | 0.39 | 4    | 1.31  | 0.50 |      |
| rs13702   | 0.653     | 0.761 | 0.961 | 0.477 | 288   | 1.18  | 0.42 | 155  | 1.17  | 0.36 | 24   | 1.25  | 0.41 |      |
| rs9644636 | 0.164     | 0.443 | 0.227 | 0.326 | 322   | 1.20  | 0.39 | 133  | 1.13  | 0.44 | 12   | 1.28  | 0.40 |      |
| rs343     | 0.761     | 0.566 | 0.559 | 0.862 | 327   | 1.53  | 0.32 | 131  | 1.55  | 0.33 | 10   | 1.58  | 0.28 |      |
| rs249     | 0.211     | 0.246 | 0.117 | 0.379 | 405   | 1.55  | 0.32 | 57   | 1.48  | 0.30 | 5    | 1.68  | 0.17 |      |
| rs316     | 0.558     | 0.506 | 0.471 | 0.941 | 389   | 1.53  | 0.32 | 76   | 1.57  | 0.30 | 3    | 1.48  | 0.32 |      |
| rs328     | 0.018     | 0.252 | 0.058 | 0.063 | 344   | 1.55  | 0.33 | 101  | 1.48  | 0.30 | 9    | 1.74  | 0.18 |      |
| rs4922115 | 0.599     | 0.564 | 0.531 | 0.929 | 383   | 1.53  | 0.32 | 81   | 1.57  | 0.31 | 3    | 1.48  | 0.32 |      |
| rs3208305 | 0.641     | 0.456 | 0.354 | 0.958 | 289   | 1.55  | 0.33 | 155  | 1.52  | 0.30 | 24   | 1.56  | 0.30 |      |
| rs3200218 | 0.602     | 0.262 | 0.278 | 0.635 | 361   | 1.53  | 0.32 | 104  | 1.56  | 0.32 | 4    | 1.64  | 0.22 |      |
| rs13702   | 0.619     | 0.440 | 0.337 | 0.959 | 288   | 1.55  | 0.33 | 155  | 1.52  | 0.30 | 24   | 1.56  | 0.30 |      |
| rs9644636 | 0.903     | 0.779 | 0.676 | 0.770 | 322   | 1.54  | 0.32 | 133  | 1.55  | 0.34 | 12   | 1.50  | 0.29 |      |
| rs343     | 0.067     | 0.090 | 0.254 | 0.018 | 327   | 0.74  | 0.02 | 131  | 0.74  | 0.02 | 10   | 0.72  | 0.03 |      |
| rs249     | 0.435     | 0.359 | 0.298 | 0.962 | 405   | 0.74  | 0.02 | 57   | 0.74  | 0.02 | 5    | 0.74  | 0.02 |      |
| rs316     | 0.004     | 0.009 | 0.032 | 0.005 | 389   | 0.74  | 0.02 | 76   | 0.73  | 0.02 | 3    | 0.70  | 0.04 |      |
| rs328     | 0.437     | 0.259 | 0.340 | 0.328 | 344   | 0.74  | 0.02 | 101  | 0.74  | 0.02 | 9    | 0.74  | 0.01 |      |
| rs4922115 | 0.006     | 0.031 | 0.091 | 0.004 | 383   | 0.74  | 0.02 | 81   | 0.74  | 0.02 | 3    | 0.70  | 0.04 |      |
| rs3208305 | 0.116     | 0.575 | 0.851 | 0.055 | 289   | 0.74  | 0.02 | 155  | 0.74  | 0.02 | 24   | 0.73  | 0.03 |      |
| rs3200218 | 0.614     | 0.912 | 0.954 | 0.423 | 361   | 0.74  | 0.02 | 104  | 0.74  | 0.02 | 4    | 0.75  | 0.01 |      |
| rs13702   | 0.121     | 0.549 | 0.887 | 0.054 | 288   | 0.74  | 0.02 | 155  | 0.74  | 0.02 | 24   | 0.73  | 0.03 |      |
| rs9644636 | 0.686     | 0.423 | 0.468 | 0.596 | 322   | 0.74  | 0.02 | 133  | 0.74  | 0.02 | 12   | 0.73  | 0.03 |      |
| rs343     | 0.969     | 0.955 | 0.939 | 0.966 | 327   | -0.02 | 0.32 | 131  | -0.02 | 0.38 | 10   | 0.01  | 0.47 |      |
| rs249     | 0.444     | 0.532 | 0.681 | 0.343 | 405   | -0.03 | 0.35 | 57   | 0.00  | 0.27 | 5    | 0.15  | 0.16 |      |
| rs316     | 0.054     | 0.304 | 0.502 | 0.050 | 389   | -0.01 | 0.33 | 76   | -0.02 | 0.37 | 3    | -0.49 | 1.12 |      |
| rs328     | 0.734     | 0.375 | 0.300 | 0.916 | 344   | -0.01 | 0.35 | 101  | -0.04 | 0.33 | 9    | 0.00  | 0.25 |      |
| rs4922115 | 0.047     | 0.629 | 0.918 | 0.049 | 383   | -0.02 | 0.33 | 81   | 0.00  | 0.36 | 3    | -0.49 | 1.12 |      |
| rs3208305 | 0.700     | 0.263 | 0.304 | 0.467 | 289   | -0.01 | 0.33 | 155  | -0.03 | 0.36 | 24   | -0.05 | 0.43 |      |
| rs3200218 | 0.501     | 0.140 | 0.132 | 0.793 | 361   | -0.03 | 0.35 | 104  | 0.01  | 0.31 | 4    | 0.06  | 0.25 |      |
| rs13702   | 0.706     | 0.267 | 0.309 | 0.468 | 288   | -0.01 | 0.33 | 155  | -0.03 | 0.36 | 24   | -0.05 | 0.43 |      |
| rs9644636 | 0.731     | 0.289 | 0.260 | 0.826 | 322   | -0.03 | 0.34 | 133  | 0.00  | 0.35 | 12   | -0.01 | 0.49 |      |

**Supplemental Table 3.** Regression analyses of LPL haplotypes with T2DM-related phenotypes while controlling for age, sex, and BMI as covariates in normal controls. Shaded boxes indicate  $p < 0.05$ .

| Haplotype ID | reg        |        |        | reg        |        |        | reg             |        |        | reg        |        |        |
|--------------|------------|--------|--------|------------|--------|--------|-----------------|--------|--------|------------|--------|--------|
|              | co-dom     | dom    | rec    | co-dom     | dom    | rec    | co-dom          | dom    | rec    | co-dom     | dom    | rec    |
|              | <b>bmi</b> |        |        | <b>whr</b> |        |        | <b>body_fat</b> |        |        | <b>sbp</b> |        |        |
| H1           | 0.1442     | 0.1632 | 0.2873 | 0.0203     | 0.1901 | 0.0239 | 0.6171          | 0.7460 | 0.3946 | 0.2754     | 0.1716 | 0.5557 |
| H2           | 0.6293     | 0.4475 | 0.2581 | 0.0009     | 0.0003 | 0.8444 | 0.2931          | 0.2216 | 0.5106 | 0.5755     | 0.5449 | 0.9577 |
| H3           | 0.1212     | 0.0770 | 0.5489 | 0.0970     | 0.1097 | 0.4592 | 0.0449          | 0.0449 |        | 0.1544     | 0.1486 | 0.7654 |
| H4           | 0.1556     | 0.1054 | 0.9946 | 0.1413     | 0.1302 | 0.6152 | 0.5836          | 0.4713 | 0.7580 | 0.7990     | 0.9891 | 0.4040 |
| H5           | 0.5068     | 0.6070 | 0.2580 | 0.8305     | 0.7904 | 0.7643 | 0.8603          | 0.7128 | 0.3349 | 0.7264     | 0.7755 | 0.6149 |

| Haplotype ID | <b>dbp</b> |        |        | <b>log-tg</b> |        |        | <b>tchol</b> |        |        | <b>hdl</b> |        |        |
|--------------|------------|--------|--------|---------------|--------|--------|--------------|--------|--------|------------|--------|--------|
| H1           | 0.5332     | 0.1677 | 0.9687 | 0.0832        | 0.0475 | 0.4377 | 0.5409       | 0.7932 | 0.5172 | 0.2528     | 0.2081 | 0.4670 |
| H2           | 0.9142     | 0.9960 | 0.6179 | 0.1583        | 0.2    | 0.3282 | 0.7827       | 0.4459 | 0.0316 | 0.3244     | 0.4769 | 0.1274 |
| H3           | 0.2795     | 0.2857 | 0.7154 | 0.8462        | 0.7666 | 0.1151 | 0.7979       | 0.8379 | 0.7548 | 0.6847     | 0.6683 | 0.9938 |
| H4           | 0.4863     | 0.5908 | 0.4380 | 0.0384        | 0.0329 | 0.5364 | 0.9955       | 0.9745 | 0.9080 | 0.3875     | 0.2907 | 0.8352 |
| H5           | 0.5619     | 0.5768 | 0.7905 | 0.1929        | 0.2222 | 0.4036 | 0.7579       | 0.8135 | 0.5853 | 0.3581     | 0.4988 | 0.0709 |

| Haplotype ID | <b>ldlc</b> |        |        | <b>log-glucose 0</b> |        |        | <b>log-glucose 60</b> |        |        | <b>log-glucose 120</b> |        |        |
|--------------|-------------|--------|--------|----------------------|--------|--------|-----------------------|--------|--------|------------------------|--------|--------|
| H1           | 0.9686      | 0.6056 | 0.7052 | 0.4144               | 0.5282 | 0.4888 | 0.4023                | 0.4243 | 0.5847 | 0.8556                 | 0.397  | 0.544  |
| H2           | 0.9822      | 0.6146 | 0.0159 | 0.3136               | 0.4583 | 0.136  | 0.6592                | 0.6684 | 0.8572 | 0.784                  | 0.9029 | 0.4423 |
| H3           | 0.7236      | 0.8066 | 0.5431 | 0.845                | 0.9375 | 0.3611 | 0.2934                | 0.4001 | 0.2917 | 0.2871                 | 0.2576 | 0.8289 |
| H4           | 0.5622      | 0.5660 | 0.7894 | 0.6074               | 0.3218 | 0.1759 | 0.7095                | 0.9176 | 0.088  | 0.8616                 | 0.9964 | 0.5133 |
| H5           | 0.7346      | 0.8400 | 0.3335 | 0.1683               | 0.2132 | 0.2175 | 0.6406                | 0.7471 | 0.245  | 0.9099                 | 0.8504 | 0.586  |

| Haplotype ID | <b>log-acuglu</b> |        |        | <b>log-insulin 0</b> |        |        | <b>log-insulin 60</b> |        |        | <b>log-insulin 120</b> |        |        |
|--------------|-------------------|--------|--------|----------------------|--------|--------|-----------------------|--------|--------|------------------------|--------|--------|
| H1           | 0.4914            | 0.5831 | 0.572  | 0.7342               | 0.6908 | 0.8871 | 0.7864                | 0.863  | 0.7876 | 0.9583                 | 0.316  | 0.3207 |
| H2           | 0.5283            | 0.5663 | 0.6636 | 0.1474               | 0.1336 | 0.8652 | 0.3028                | 0.3213 | 0.6442 | 0.4928                 | 0.5357 | 0.6222 |
| H3           | 0.1656            | 0.2027 | 0.3721 | 0.7839               | 0.6355 | 0.6169 | 0.7111                | 0.8099 | 0.5873 | 0.8842                 | 0.639  | 0.3531 |
| H4           | 0.8689            | 0.7165 | 0.0727 | 0.516                | 0.6355 | 0.4053 | 0.7098                | 0.4929 | 0.3808 | 0.5879                 | 0.3515 | 0.2903 |
| H5           | 0.6039            | 0.6853 | 0.3469 | 0.6442               | 0.7597 | 0.2118 | 0.4779                | 0.4005 | 0.3912 | 0.3902                 | 0.4829 | 0.1835 |

| Haplotype ID | <b>log-aucins</b> |        |        | <b>log-hba1c</b> |        |        | <b>log-homa_ir</b> |        |        |
|--------------|-------------------|--------|--------|------------------|--------|--------|--------------------|--------|--------|
| H1           | 0.8127            | 0.846  | 0.8502 | 0.4221           | 0.2617 | 0.8886 | 0.6983             | 0.6647 | 0.8537 |
| H2           | 0.2687            | 0.2846 | 0.6381 | 0.7446           | 0.8652 | 0.4236 | 0.1344             | 0.1258 | 0.7929 |
| H3           | 0.8245            | 0.7466 | 0.8252 | 0.3501           | 0.3968 | 0.5252 | 0.7767             | 0.6428 | 0.6623 |
| H4           | 0.2155            | 0.098  | 0.3885 | 0.445            | 0.3818 | 0.9543 | 0.5421             | 0.6849 | 0.3633 |
| H5           | 0.259             | 0.2548 | 0.9028 | 0.0057           | 0.0244 | <.0001 | 0.712              | 0.8232 | 0.2476 |
